# Supplementary material for: Exploring Biomarkers Related to Autophagy in Alzheimer's Disease Based on Pathway Crosstalk Analysis
Source: Research Square preprint supplement (doi:10.21203/rs.3.rs-784797/v1), 2021-08-10
Supplement: Supplementary file 1 [file 2c3849607370da09d389e0d5.docx]

Definition of survival time and survival status of AD patients

Because the age of patients over 90 years old in the clinical data is shown as 90+, we set the observation starting point as the time of diagnosis of each patient and the observation ending point as 90 years old. The survival status of patients with a death age of 90+ is alive, while the survival status of patients with a death age of less than 90 is dead, and the survival time of 82 patients was finally obtained. The clinical data downloaded from the AMP-AD database were sorted and screened, and then the survival time and clinical characteristics (braaksc, ceradsc, dcfdx_lv: clinical cognitive diagnosis summary at last visit) of 82 patients were obtained.
