# Supplementary material for: Exploring Biomarkers Related to Autophagy in Alzheimer's Disease Based on Pathway Crosstalk Analysis
Source: Research Square preprint supplement (doi:10.21203/rs.3.rs-784797/v1), 2021-08-10
Supplement: Supplementary file 2 [file aa8bb426bd2c86bf970d0e3e.docx]

Table1 Top 30 differential genes

| id | log2FC | pvalue | padj | regulate |
| --- | --- | --- | --- | --- |
| AC009063.2 | 0.770513051 | 1.63E-10 | 4.09E-07 | UP-regulated |
| AC008737.3 | 0.932512925 | 4.95E-10 | 7.46E-07 | UP-regulated |
| AL450313.1 | 1.79036646 | 1.16E-09 | 1.45E-06 | UP-regulated |
| LINC01736 | 0.810530425 | 1.09E-08 | 1.02E-05 | UP-regulated |
| AC243964.2 | 1.221925555 | 1.62E-08 | 1.36E-05 | UP-regulated |
| LINC02172 | 0.751632155 | 1.32E-07 | 5.25E-05 | UP-regulated |
| AL390066.1 | 0.561995855 | 4.48E-07 | 0.000116451 | UP-regulated |
| LINC01134 | 0.667604638 | 6.04E-07 | 0.000142305 | UP-regulated |
| LINC01445 | 0.569507479 | 8.44E-07 | 0.00019293 | UP-regulated |
| AC002428.2 | 0.819012877 | 1.25E-06 | 0.000244382 | UP-regulated |
| AP003117.1 | 0.539248872 | 1.26E-06 | 0.000244382 | UP-regulated |
| AC127496.1 | 0.588155825 | 4.09E-06 | 0.000512292 | UP-regulated |
| AL355974.3 | 0.660144797 | 1.29E-05 | 0.001148947 | UP-regulated |
| LINC02397 | 0.968817228 | 2.11E-05 | 0.001638011 | UP-regulated |
| AC092155.1 | 0.777738272 | 2.27E-05 | 0.001708868 | UP-regulated |
| ERVH-1 | -0.762166936 | 2.89E-10 | 5.45E-07 | DOWN-regulated |
| FAM225B | -1.055485404 | 2.06E-08 | 1.42E-05 | DOWN-regulated |
| AC015819.3 | -0.704015057 | 3.61E-08 | 2.01E-05 | DOWN-regulated |
| AC016576.1 | -1.003937063 | 1.53E-07 | 5.50E-05 | DOWN-regulated |
| AC010266.2 | -0.551501253 | 1.93E-07 | 6.13E-05 | DOWN-regulated |
| AC016205.1 | -0.736957053 | 3.63E-07 | 0.000104717 | DOWN-regulated |
| AC018541.1 | -1.022992779 | 1.11E-06 | 0.000238355 | DOWN-regulated |
| LINC01844 | -0.555035901 | 1.45E-06 | 0.000270919 | DOWN-regulated |
| AC074351.1 | -0.822739102 | 2.19E-06 | 0.000366291 | DOWN-regulated |
| LINC01476 | -0.567521021 | 3.53E-06 | 0.000480776 | DOWN-regulated |
| AL353608.3 | -0.620152796 | 3.57E-06 | 0.000480776 | DOWN-regulated |
| LINC00507 | -0.551519082 | 3.92E-06 | 0.000501233 | DOWN-regulated |
| LINC01007 | -0.62218615 | 4.14E-06 | 0.000512292 | DOWN-regulated |
| LINC02296 | -0.686097709 | 4.89E-06 | 0.000562348 | DOWN-regulated |
| AC010425.1 | -0.793469236 | 7.74E-06 | 0.000748242 | DOWN-regulated |
